# Supplementary material for: Psychiatric comorbidities in women with cardiometabolic conditions with and without ADHD: a population-based study
Source: Springer Nature journal article supplement (doi:10.1186/s12916-023-03160-7), 2023-11-20

**Age group****Non-ADHD (N=24369) ADHD (N=2299) Prevalence ratio (95%CI)**

18–30 24.9% 32.4% 1.30 (1.17–1.45)\*\*\*

31–45 38.2% 45.2% 1.18 (1.10–1.28)\*\*\*

46–69 52.6% 57.5% 1.09 (1.02–1.18)\*

\*\*\*p&lt;0.001, \*\*p&lt;0.01, \*p&lt;0.05

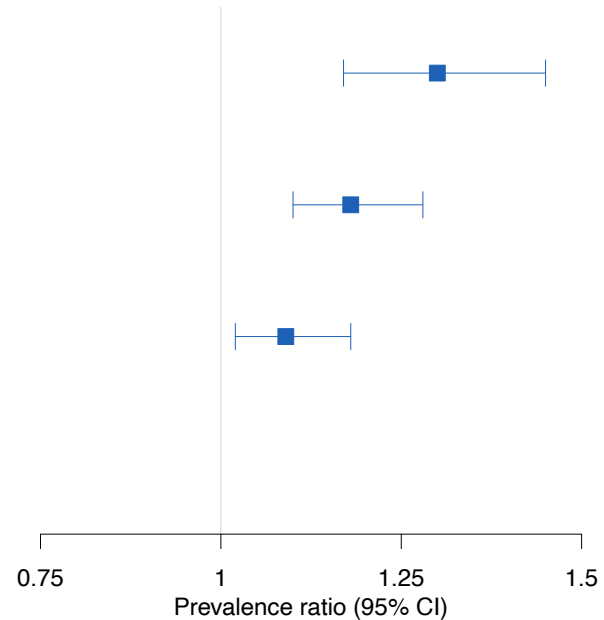

Supplement: MOESM2 [file 26333168]
