# Supplementary material for: Psychiatric comorbidities in women with cardiometabolic conditions with and without ADHD: a population-based study
Source: Springer Nature journal article supplement (doi:10.1186/s12916-023-03160-7), 2023-11-20

a) 18–30 years

Cardiometabolic condition Non-ADHD (N=4564) ADHD (N=895) Prevalence ratio (95% CI)

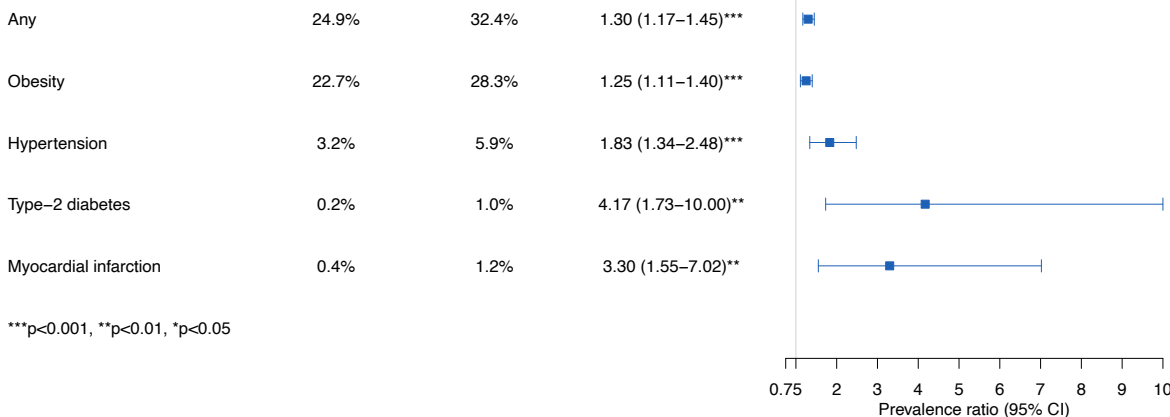

b) 31–45 years

Cardiometabolic condition Non-ADHD (N=8069) ADHD (N=890) Prevalence ratio (95% CI)

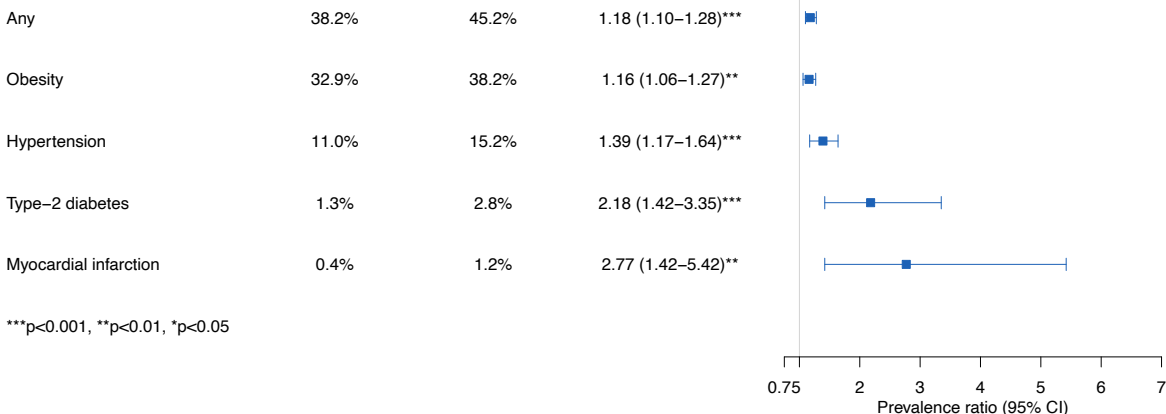

c) 46 years and older

Cardiometabolic condition Non-ADHD (N=12855) ADHD (N=583) Prevalence ratio (95% CI)

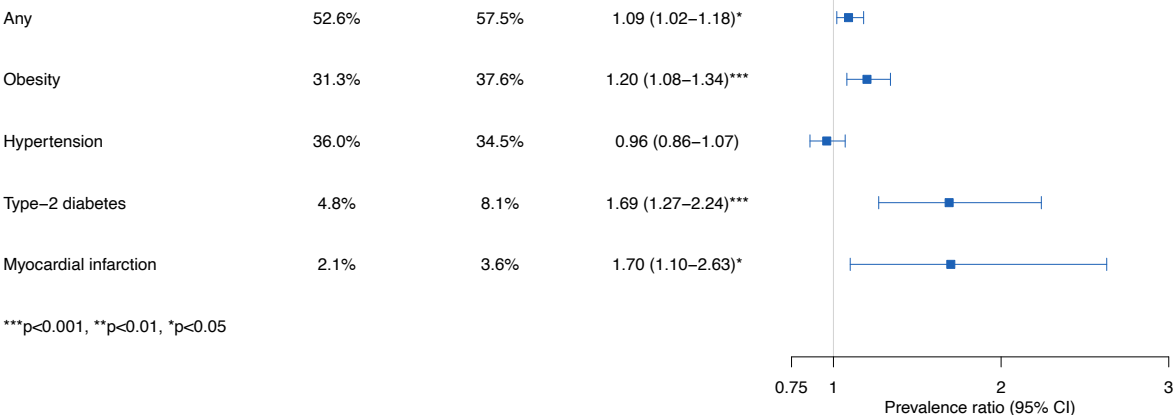

Supplement: MOESM3 [file 26333168]
