# Supplementary material for: Psychiatric comorbidities in women with cardiometabolic conditions with and without ADHD: a population-based study
Source: Springer Nature journal article supplement (doi:10.1186/s12916-023-03160-7), 2023-11-20
Supplement: MOESM4 [file 26333168]

a) 18–30 years

| Psychiatric disorder                | CMC (N=1102) | CMC + ADHD (N=288) | Prevalence ratio (95% CI) |
|-------------------------------------|--------------|--------------------|---------------------------|
| Any                                 | 50.1%        | 86.1%              | 1.72 (1.60–1.85)***       |
| Depression                          | 31.9%        | 61.8%              | 1.94 (1.71–2.19)***       |
| Bipolar Disorder                    | 2.5%         | 8.7%               | 3.54 (2.09–6.01)***       |
| Social Phobia                       | 19.7%        | 42.7%              | 2.17 (1.81–2.60)***       |
| GAD                                 | 36.0%        | 53.8%              | 1.49 (1.31–1.71)***       |
| PTSD                                | 17.8%        | 42.0%              | 2.36 (1.96–2.85)***       |
| OCD                                 | 6.8%         | 21.5%              | 3.16 (2.32–4.31)***       |
| Alcoholism/SUD                      | 2.0%         | 7.6%               | 3.83 (2.15–6.81)***       |
| <b>Current psychiatric symptoms</b> |              |                    |                           |
| Moderate/severe depressive          | 49.5%        | 71.9%              | 1.45 (1.32–1.59)***       |
| Moderate/severe anxiety             | 35.5%        | 60.4%              | 1.70 (1.51–1.93)***       |
| PTSD over cut-off                   | 33.9%        | 60.8%              | 1.79 (1.58–2.03)***       |
| <b>Type of self-harm</b>            |              |                    |                           |
| Self-harm without suicide intent    | 28.6%        | 33.7%              | 1.18 (0.98–1.42)          |
| Self-harm with suicide intent       | 18.9%        | 35.1%              | 1.86 (1.52–2.27)***       |

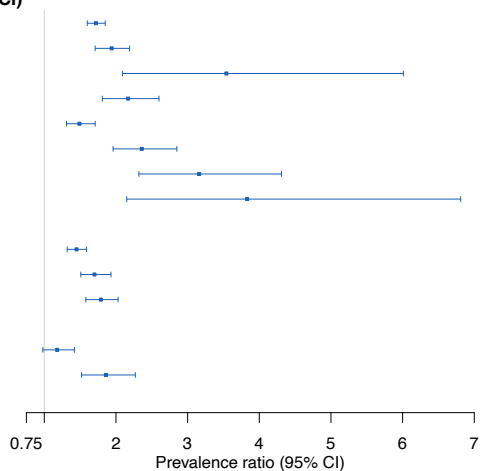

b) 31–45 years

| Psychiatric disorder                | CMC (N=3013) | CMC + ADHD (N=394) | Prevalence ratio (95% CI) |
|-------------------------------------|--------------|--------------------|---------------------------|
| Any                                 | 40.6%        | 79.2%              | 1.95 (1.83–2.09)***       |
| Depression                          | 21.7%        | 50.5%              | 2.33 (2.07–2.62)***       |
| Bipolar Disorder                    | 2.0%         | 8.1%               | 4.08 (2.69–6.18)***       |
| Social Phobia                       | 11.1%        | 36.0%              | 3.26 (2.76–3.85)***       |
| GAD                                 | 23.9%        | 53.6%              | 2.24 (2.01–2.51)***       |
| PTSD                                | 14.8%        | 39.6%              | 2.67 (2.30–3.10)***       |
| OCD                                 | 3.5%         | 14.7%              | 4.26 (3.15–5.78)***       |
| Alcoholism/SUD                      | 3.4%         | 14.7%              | 4.39 (3.24–5.96)***       |
| <b>Current psychiatric symptoms</b> |              |                    |                           |
| Moderate/severe depressive          | 41.9%        | 70.3%              | 1.68 (1.56–1.81)***       |
| Moderate/severe anxiety             | 29.0%        | 58.1%              | 2.01 (1.81–2.22)***       |
| PTSD over cut-off                   | 28.6%        | 60.4%              | 2.11 (1.91–2.33)***       |
| <b>Type of self-harm</b>            |              |                    |                           |
| Self-harm without suicide intent    | 16.3%        | 25.6%              | 1.58 (1.31–1.90)***       |
| Self-harm with suicide intent       | 8.2%         | 25.4%              | 3.08 (2.51–3.79)***       |

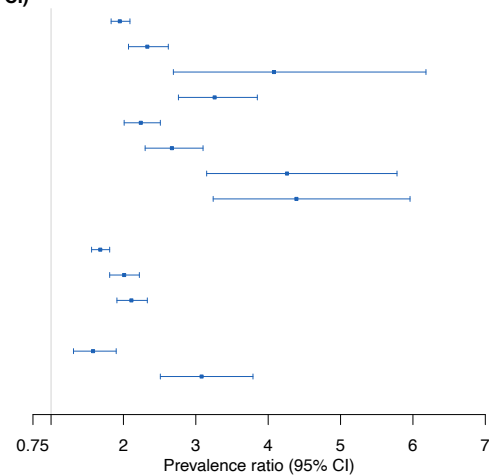

c) 46 years and older

| Psychiatric disorder                | CMC (N=6395) | CMC + ADHD (N=328) | Prevalence ratio (95% CI) |
|-------------------------------------|--------------|--------------------|---------------------------|
| Any                                 | 24.8%        | 72.6%              | 2.92 (2.70–3.16)***       |
| Depression                          | 11.4%        | 42.7%              | 3.74 (3.24–4.31)***       |
| Bipolar Disorder                    | 1.3%         | 10.4%              | 8.18 (5.57–12.00)***      |
| Social Phobia                       | 5.5%         | 25.3%              | 4.57 (3.70–5.65)***       |
| GAD                                 | 11.1%        | 38.4%              | 3.47 (2.98–4.05)***       |
| PTSD                                | 9.9%         | 37.8%              | 3.83 (3.27–4.48)***       |
| OCD                                 | 0.9%         | 9.8%               | 11.30 (7.44–17.30)***     |
| Alcoholism/SUD                      | 3.2%         | 17.4%              | 5.42 (4.13–7.11)***       |
| <b>Current psychiatric symptoms</b> |              |                    |                           |
| Moderate/severe depressive          | 24.7%        | 62.5%              | 2.53 (2.31–2.78)***       |
| Moderate/severe anxiety             | 14.5%        | 38.1%              | 2.63 (2.27–3.06)***       |
| PTSD over cut-off                   | 23.6%        | 50.6%              | 2.15 (1.91–2.41)***       |
| <b>Type of self-harm</b>            |              |                    |                           |
| Self-harm without suicide intent    | 5.5%         | 14.0%              | 2.53 (1.90–3.37)***       |
| Self-harm with suicide intent       | 2.7%         | 10.4%              | 3.90 (2.75–5.54)***       |

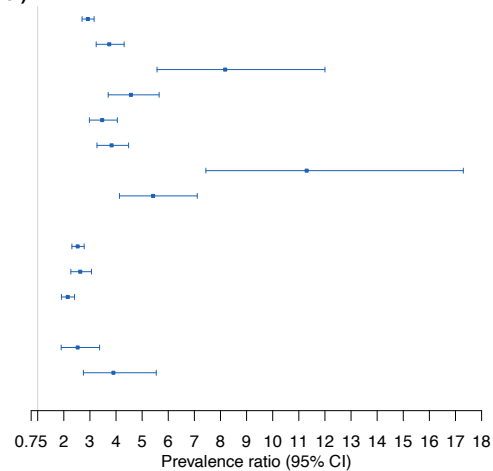

\*\*\*p<0.001, \*\*p<0.01, \*p<0.05

\*\*\*p<0.001, \*\*p<0.01, \*p<0.05

\*\*\*p<0.001, \*\*p<0.01, \*p<0.05
